# Supplementary material for: Solvent-free sonochemistry: Sonochemical organic synthesis in the absence of a liquid medium
Source: publisher site journal article supplement (doi:10.3762/bjoc.13.179), 2017-09-04
Supplement: Additional file 1 [file 1860-5397-13-179-S1.pdf]

## **Supporting Information**

for

# **Solvent-free sonochemistry: Sonochemical organic synthesis in the absence of a liquid medium**

Deborah E. Crawford\*

Address: School of Chemistry and Chemical Engineering, Queen's University  
Belfast, David Keir Building, 39–123 Stranmillis Road, Belfast, BT9 5AG, Northern  
Ireland, UK

Email: Deborah E. Crawford - [d.crawford@qub.ac.uk](mailto:d.crawford@qub.ac.uk)

\*Corresponding author

## **Experimental part**

## 1. Experimental details

All materials were purchased from Sigma-Aldrich UK with >98% purity. The particle size of the reagents was reduced by ball milling each reagent individually, in a 25 cm<sup>3</sup> stainless steel ball mill jar, with a 13.6 g ball bearing, at 25 Hz for 5 minutes (<500 μm) or 10 minutes (<200 μm) (employing a Retsch MM400 vibrational ball mill). The obtained powders were then sieved to obtain the desired particle size. Ultrasonic irradiation was carried out using a standard 35 kHz ultrasound bath. NMR spectroscopy was carried out with a Bruker Advance DPX 300 using CDCl<sub>3</sub> or DMSO-*d*<sub>6</sub> as solvent. Infrared spectroscopy was carried out using a Fourier Transform IR, Perkin Elmer Spectrum 1, with CsI beam splitter - 4000–200 cm<sup>-1</sup> using a pressed KBr disc. X-ray powder diffraction was carried out using a PANalytical X'Pert Pro diffractometer with Cu Kα radiation.

## 2. Synthesis of 1

*O*-Vanillin of a particle size <200 μm (0.50 g, 3.29 mmol), 1,2-phenylenediamine of particle size <200 μm (0.36 g, 3.29 mmol) and anhydrous Na<sub>2</sub>CO<sub>3</sub> (0.035 g, 0.329 mmol) were mixed in a 25 mL glass vial. The mixture was sonicated at 35 kHz for 10 minutes and then the ultrasonic bath was left to cool back to 25 °C (from ca. 30 °C). This process was repeated six times so that the sample was irradiated by ultrasound for 60 minutes. This produced a dark red solid. <sup>1</sup>H NMR spectroscopy was carried out in CDCl<sub>3</sub>.

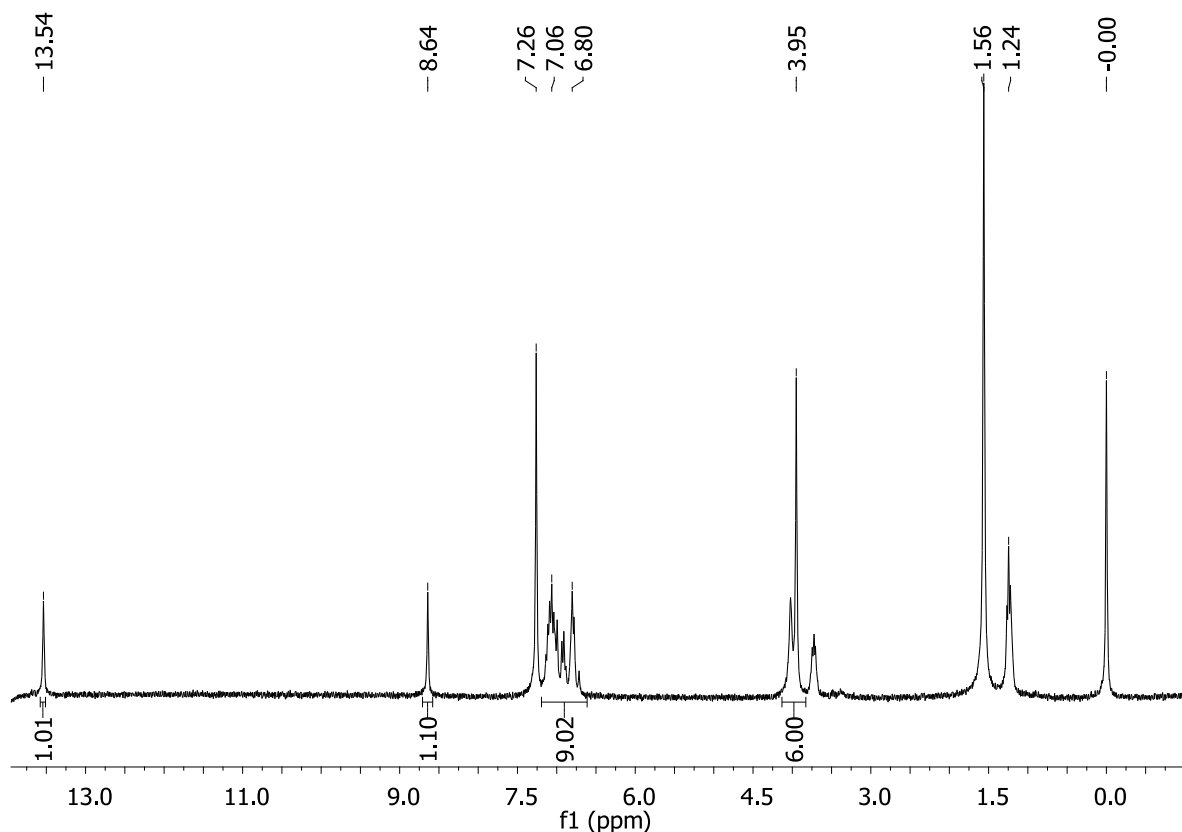

**Figure S1:** <sup>1</sup>H NMR spectrum of **1** in CDCl<sub>3</sub>/EtOD.

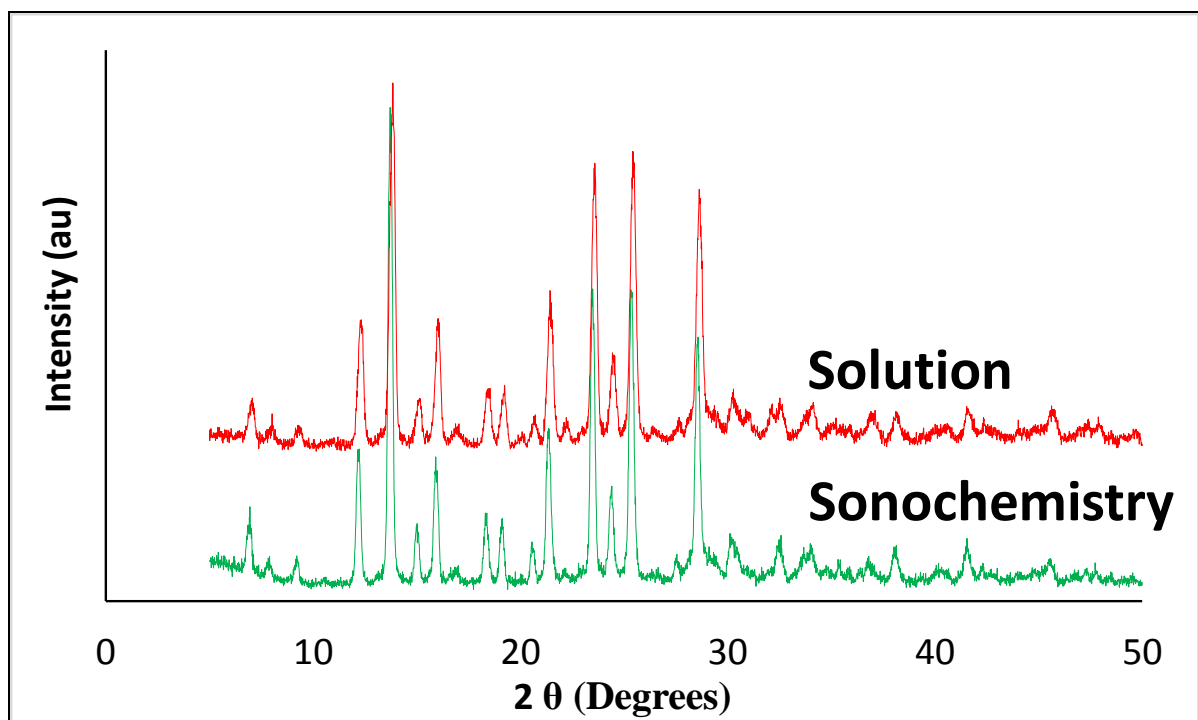

**Figure S2:** PXRD patterns of **1** prepared from solution and ultrasonication.

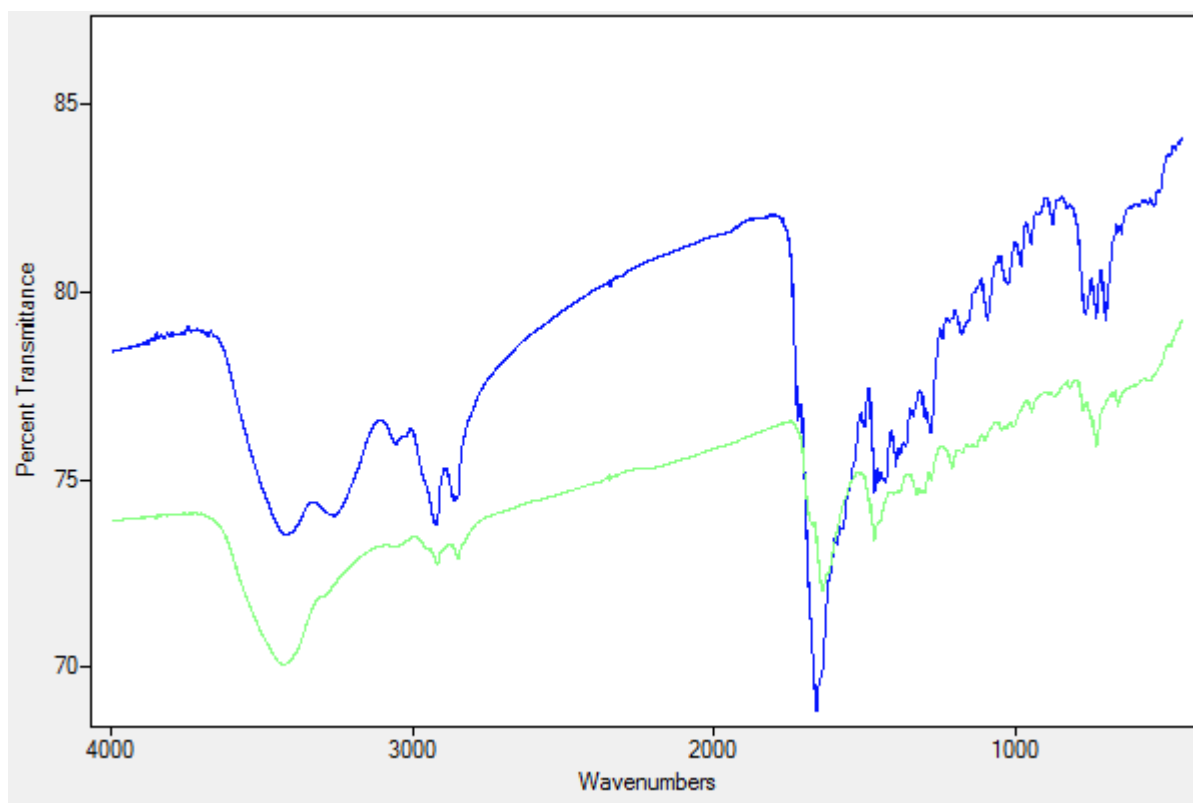

**Figure S3:** IR spectra of **1** (green – sonication, blue – solution) with an imine stretching band at  $1645\text{ cm}^{-1}$  (with baseline corrected).

### 3. Synthesis of 2

Ninhydrin of a particle size  $<200\ \mu\text{m}$  (0.50 g, 2.81 mmol) and dimedone of particle size  $<200\ \mu\text{m}$  (0.39 g, 2.81 mmol) were mixed in a 25 mL glass vial. The mixture was sonicated at 35 kHz for 10 minutes and then the ultrasonic bath was left to cool back to 25 °C (from ca. 30 °C). This process was repeated nine times so that the sample was irradiated by ultrasound for 90 minutes. This produced a pink solid.  $^1\text{H}$  NMR spectroscopy was carried out in  $\text{DMSO-}d_6$ .

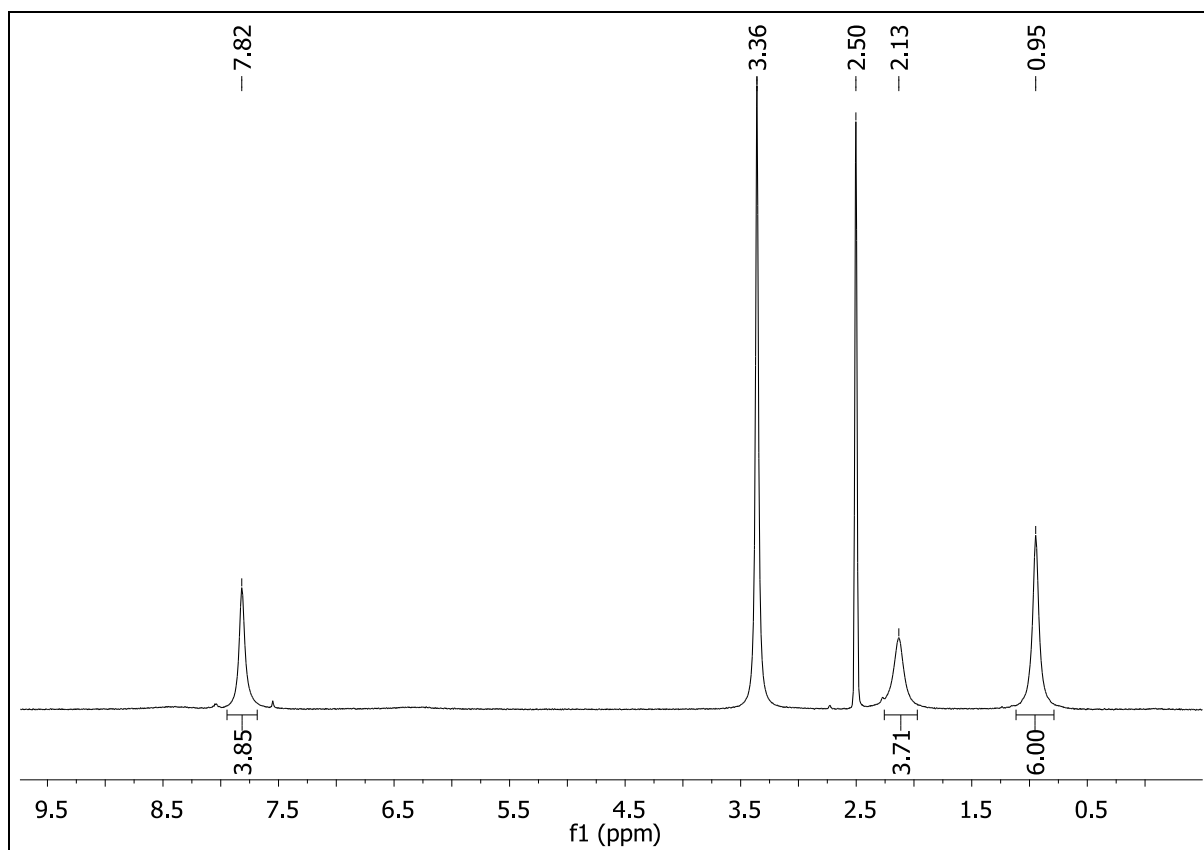

**Figure S4:**  $^1\text{H}$  NMR spectrum of 2 in  $\text{DMSO-}d_6$ .

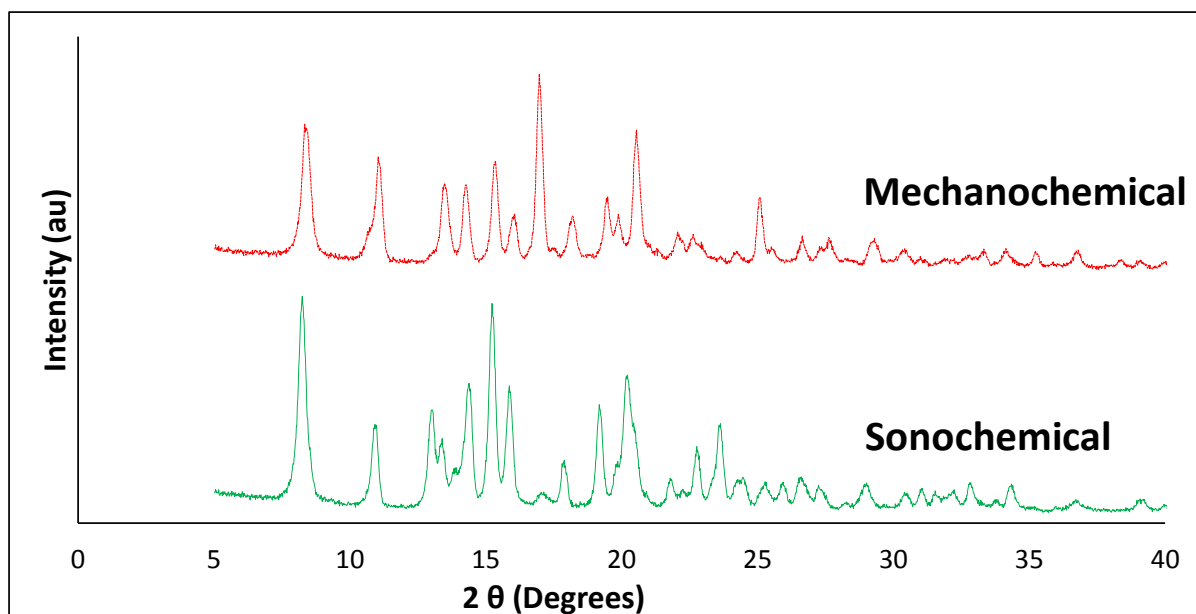

**Figure S5:** PXRD patterns of **2** prepared from twin screw extrusion and ultrasonication.
